# Supplementary material for: Timing the Evolutionary Advent of Cyanobacteria and the Later Great Oxidation Event Using Gene Phylogenies of a Sunscreen
Source: PubMed Central journal article supplement (PMC6529634; doi:10.1128/mbio.00561-19), 2019-05-21
Supplement: mBio.00561-19-s0001.pdf [file mBio.00561-19-s0001.pdf]

## SUPPLEMENTARY FILE 10

### A: Genomes used in the analyses.

#### Preliminary analyses

##### Cyanobacteria

Acaryochloris sp. CCMEE 5410  
Acaryochloris marina MBIC11017  
Anabaena cylindrica PCC 7122  
Anabaena sp. 90  
Anabaena variabilis ATCC 29413  
Arthrospira maxima CS-328  
Arthrospira platensis NIES-39  
Arthrospira sp. PCC 8005  
Calothrix desertica PCC 7102  
Calothrix sp. PCC 6303  
Chamaesiphon minutus PCC 6605  
Chlorogloeopsis fritschii PCC 6912  
Chroococcidiopsis sp. PCC 6712  
Chroococcidiopsis thermalis PCC 7203  
Coleofasciculus chthonoplastes PCC 7420  
Crinalium epipsammum PCC 9333  
Crocospaera watsonii WH 0003  
Cyanobacterium aponinum PCC 10605  
Cyanobacterium sp. ESFC-1  
Cyanobacterium stanieri PCC 7202  
Cyanobium gracile PCC 6307  
Cyanobium sp. PCC 7001  
Cyanothece sp. ATCC 51142  
Cyanothece sp. PCC 7425  
Cylindrospermopsis raciborskii CS-505  
Cylindrospermum stagnale PCC 7417  
Dactylococcopsis salina PCC 8305  
Fischerella muscicola PCC 7414  
Fischerella sp. PCC 9605  
Fischerella thermalis PCC 7521  
Geitlerinema sp. PCC 7407  
Geminocystis herdmanii PCC 6308  
Gloeobacter kilaueensis JS1  
Gloeobacter violaceus PCC 7421  
Gloeocapsa sp. PCC 7428  
Halothece sp. PCC 7418  
Leptolyngbya boryana PCC 6306  
Leptolyngbya sp. PCC 7376  
Lyngbya aestuarii BL J  
Lyngbya sp. PCC 8106  
Mastigocladopsis repens PCC 10914  
Mastigocoleus testarum BC008  
Microchaete sp. PCC 7126

##### Other bacteria

Pseudomonas aeruginosa PAO1  
Caulobacter sp. K31  
Deinococcus radiodurans R1  
Microcoleus sp. PCC 7113  
Microcoleus vaginatus PCC 9802  
Microcystis aeruginosa NIES-843  
Microcystis sp. T1-4  
Moorea producens 3L  
Nodosilinea nodulosa PCC 7104  
Nodularia spumigena CCY9414  
Nostoc punctiforme PCC 73102  
Nostoc sp. PCC 7107  
Nostoc sp. PCC 7120  
Oscillatoria acuminata PCC 6304  
Oscillatoria formosa PCC 6407  
Oscillatoria nigro-viridis PCC 7112  
Oscillatoria sp. PCC 7113  
Planktothrix agardhii NIVA-CYA 126/8  
Planktothrix prolifica NIVA-CYA 406  
Planktothrix rubescens NIVA-CYA 407  
Pleurocapsa sp. PCC 7327  
Prochlorococcus marinus str. AS9601  
Prochlorococcus marinus subsp. marinus str. CCMP1375  
Prochlorococcus sp. W2  
Prochlorothrix hollandica PCC 9006  
Prochlorothrix sp. PCC 9006  
Pseudanabaena sp. PCC 7367  
Raphidiopsis brookii D9  
Richelia intracellularis HM01  
Rivularia sp. PCC 7116  
Rubidibacter lacunae KORDI 51-2  
Scytonema hofmanni PCC 7110  
Spirulina major PCC 6313  
Spirulina subsalsa PCC 9445  
Stanieria cyanosphaera PCC 7437  
Synechococcus elongatus PCC 6301  
Synechococcus sp. CC9311  
Synechococcus sp. JA-3-3Ab  
Synechocystis sp. PCC 6803  
Thermosynechococcus elongatus BP-1  
Tolypothrix sp. PCC 9009  
Trichodesmium erythraeum IMS101  
Trichormus azollae ('Nostoc azollae' 0708)  
Xenococcus sp. PCC 7305

Clostridium acetobutylicum ATCC 824  
Streptomyces aurantiacus JA 4570  
Streptomyces coelicolor A32

Escherichia coli K 12  
Geobacter sp. M21

Listeria monocytogenes

Eukaryotes (viridiplantae)

Cyanidioschyzon merolae  
Galdieria sulphuraria  
Chlamydomonas reinhardtii

Physcomitrella patens  
Arabidopsis thaliana

**Final analyses (cyanobacteria)**

|                                                        |           |                                    |         |
|--------------------------------------------------------|-----------|------------------------------------|---------|
| Chamaesiphon minutus PCC 6605                          | GenBank   | Lyngbya sp. PCC 8106               | GenBank |
| Acaryochloris marina MBIC11017                         | GenBank   | Mastigocladopsis repens PCC 10914  | GenBank |
| Anabaena variabilis ATCC 29413                         | CyanoBase | Mastigocladus laminosus UU774      | GenBank |
| Aphanocapsa montana BDHKU210001                        | GenBank   | Mastigocoleus testarum BC008       | GenBank |
| Arthrospira maxima CS-328                              | GenBank   | Microchaete sp. PCC 7126           | GenBank |
| Calothrix PCC 7103                                     | GenBank   | Microcoleus vaginatus FGP-2        | GenBank |
| Chlorogloeopsis fritschii PCC 6912                     | GenBank   | Microcystis aeruginosa DIANCHI905  | GenBank |
| Chroococcidiopsis sp. PCC 8201                         | Dryad     | Moorea producens 3L                | GenBank |
| Chroococcidiopsis sp. PCC 6712                         | JGI       | Myxosarcina sp. GI1                | GenBank |
| Chroococcidiopsis sp. PCC 7434                         | Dryad     | Neosynechococcus sphagnicola syl   | GenBank |
| Chroococcidiopsis thermalis PCC 7203                   | GenBank   | Nodosilinea nodulosa PCC 7104      | GenBank |
| Coleofasciculus chthonoplastes PCC 7420                | GenBank   | Nodularia spumigena CCY9414        | GenBank |
| Crinalium epipsammum PCC 9333                          | GenBank   | Nostoc punctiforme PCC 73102       | GenBank |
| Crocospaera watsonii WH 0003                           | GenBank   | Nostoc sp. PCC 7120                | GenBank |
| Cyanobacterium aponimum PCC 10605                      | GenBank   | Nostoc sp. NIES-3756               | GenBank |
| Cyanobium gracile PCC 6307                             | GenBank   | Oscillatoria acuminata PCC 6304    | GenBank |
| Cyanothece PCC 7424                                    | GenBank   | Pleurocapsa sp. PCC 7327           | GenBank |
| Cyanothece PCC 7822                                    | GenBank   | Prochlorococcus marinus AS 9601    | GenBank |
| Cylindrospermum stagnale PCC 7417                      | GenBank   | Pseudanabaena sp. PCC 7367         | GenBank |
| Dactylococcopsis salina PCC 8305                       | GenBank   | Rivularia sp. PCC 7116             | GenBank |
| Fischerella muscicola PCC 73103                        | GenBank   | Scytonema hofmanni PCC 7110        | GenBank |
| Geitlerinema sp. PCC 7407                              | GenBank   | Scytonema hofmanni UTEX 2349       | GenBank |
| Gloeobacter kilaueensis JS1                            | GenBank   | Stanieria cyanosphaera PCC 7437    | GenBank |
| Gloeobacter violaceus PCC 7421                         | GenBank   | Synechococcus sp. CC9311           | GenBank |
| Gloeocapsa sp. PCC 7428                                | GenBank   | Synechococcus sp. JA-2-3B          | GenBank |
| Gloeomargarita lithophora                              | Moreira   | Synechococcus sp. JA-3-3Ab         | GenBank |
| <i>et al.</i> (personal communication, now in GenBank) |           | Synechocystis PCC 7509             | GenBank |
| Halothece sp. PCC 7418                                 | GenBank   | Thermosynechococcus elongatus BP-1 | GenBank |
| Leptolyngbya boryana PCC 6306                          | GenBank   | Trichodesmium erythraeum 21-75     | GenBank |
| Lyngbya aestuarii BL J                                 | GenBank   | Xenococcus sp. PCC 7305            | GenBank |

**B: Sequences from Nostoc punctiforme PCC 73102 (ATCC 29133) used as seeds in the phylogenetic analyses.**

GenBank accession # changes as work was being performed, so the headers contain both the older gi references from the original seeds and the current updated accession numbers (17-20-04).

AroG-sc

>gi|186681728|ref|WP\_012408002.1| 3-deoxy-7-phosphoheptulonate synthase [Nostoc punctiforme PCC 73102]

MIILKNGTPAEEITRISQELSETWKVTVEKSIGTHKVVVLGLIGDTTSIDKLQIQEYSPWIEQVLR  
VQQPFKRVSREFRHGEASEVVVPTPNGDVYFGEHHPIVVVAGPCSVENEAMIVETAKRVKAA

GAKFLRGGAYKPRTSPYAFQGYGESALDLLAAAREATGLGIVTELMDAADLSAVARTADIIQI  
GARNMHNFSLKKVGAQDKPVLLKRGMSATIDEWLMAAEYILASGNPNVILCERGIRTFDGG  
YARNTLDLSVLPVLRSLTHLPIMIDPSHGTGRSEYVPSMAIAAIAAGTDSLMIHVHPNPAKALS  
DGPQSLTPDKFDRLVQEMSIIGKVVDWRWSTPTFDSINDNRILFAPELSK

AroG

>gi|186463676|gb|ACC79477.1| phospho-2-dehydro-3-deoxyheptonate aldolase [Nostoc punctiforme PCC 73102]

MIIVMKTGSPEAEINRIDEELTSWGLTPEKIVGQHKVVIGLVGETASLDPLQIQELSPWIEQVLR  
VEQPYKRASRQYRHGEASEVVVNTPNGAVVFGHEHQPLVVVAGPCSVENEEMIVETARRVKT  
AGAKFLRGGAYKPRTSPYAFQGHGESALDLLARAREVSGLGIITEVMDAADLDKIVEVADVIQ  
VGARNMQNFSLKKVGAQPKPVLLKRGMAATIEDWLMAAEYVVLASGNSNVILCERGIRTFDR  
QYTRNTLDLSVVPVLRKLTHLPIMIDPSHGVGWSEFVPSMAMAAIAAGTDSLMIHVHPNPAKA  
LSDGPQSLTPDRFDNLMQELAVIGKAVGRWQQPAVALA

AroB-sc

>gi|186681735|ref|WP\_012408009.1| 3-dehydroquinate synthase [Nostoc punctiforme PCC 73102]

MIVDIKQKSRLIHRVSVSFNYEVYFTQNLFELKNPTLAQVISADEETKPKKVVAVIDAGILKY  
QPELVKQLVA YTKFYGEVLAIAAEPMIISGGEAAKNDRTLVEQIQQLIETAGLCRHSYVLAIGG  
GAVLDLVGYAAATAHRGIRLIRVPTTVLAQNDSGVGVKNGINAFGKKNFLGTFAPPYAVINDS  
AFLTTLDDRDRWRSIAEAVKVALIKDANFFDFIHSKALGRRDMDAMQQVIYRCAQLHLEHI  
ANSGDPFEMGSSRPLDFGHWAHAKLEHLTNYRLRHGEAVAIGIALDSTYSYLAGLLDCSEWQ  
RILNTLSALGFTLYVPELAQKLSQQEHPDCLFRGLTEFREHLGGELTLTLLKNIGKAIEVHEVNL  
LLYRQAISLLQEF

AroB

>gi|186685776|ref|WP\_012411972.1| 3-dehydroquinate synthase [Nostoc punctiforme PCC 73102]

MTSLINVNLPEQSYEIAIAPSNLDQLGQQMANLKLKGVLLVSNPTIFKHYGERAITSLKSAGF  
EVASCTLPPGERYKNLNSIQKLYDVALENRLERSATMVALGGGVIGDMTGFAAATWLRGINV  
VQVPTTLLAMVDSAIGGKTGVNHPHGKNLIGAFHQPRVLIDPDVLKTLPMREFRAGMAAEVIK  
YGVWDAELFAQLEASKRLDQLRYVKPELIDSILTRSCQAKADVVGKDEKEGGLRAILNYGHT  
IGHAVESLTGYRLVNHGEAVAIGMVAAGQIAVELGMWQKEDTERQNALIQTGLPTQLPSGV  
DIEAII DALQLDKKVKAGKVRFLPTEIGVVTVTDEVPSDIIRQVLQGM

TyrA-sc

>gi|186681737|ref|WP\_012408011.1| prephenate dehydrogenase [Nostoc punctiforme PCC 73102]

MPLKSSYSQDLKKTDQSLIALLSDRISLLASEQPSLDEQLASVAPLLAQAGIPESVWAGVVNSC  
HASLTPKSAINHASPRQVTIIGGRGRMGRLFQEQLSLVGHNVSILEHEDWEYAEQLLSQAELVL  
VSVPIEHTVDVIKRAAKYLASNTALCDITSIKTQPTQAMLEHHCGPVMGLHPMFGPNIKSFLGQ  
KVVVCPGRNDDSFQWLLDFLKS KGGELIVCTPEEHRMMVIIQATQHFCRFSGLGVFLAQRVE

IEQSLTMSTPNYRQEIDIVKRLFAQNPNCVDIMLATEERCNAISFLANTYSRLARLVARKDRE  
ALIKEFENTQSFFEGKINSFLQPLNTTALKRDFKPQNI

TyrA

>gi|186681456|ref|WP\_012407731.1| arogenate dehydrogenase [Nostoc punctiforme PCC 73102]

MSKMKMNIGILGLGLIGGSLGFDLRSQGHILGVSRRRESTCQKAVAIGSVDEASVDLSLLAAAE  
VVFICTPLALIVPQLEQMI AHLSTATIVTDVGS AKAQIVK AISPLW DNFIFGGHPMAGRTDSGIEA  
AQRNLFVDKPYVLTPIATTP TSAIAVVEEIVRSLGANIYYCQPEQH DRAVSWISHLPVMVSSSLI  
AACLSETDPDVLELAQKLASSGFRDTSRVGGGNPELGVMMARYNRQALLRSLQQYRHNLDE  
LTNLIEQENWTVLEQKLGKSTGKARPDFVD

TrpD-sc

>gi|186681729|ref|WP\_012408003.1| anthranilate phosphoribosyltransferase [Nostoc punctiforme PCC 73102]

MIAVTQTPPDNIAIPSEFYNWSALLQQLNRQSLTVPQAADLMQGWLTDAIPHVLSGAILAAIQ  
AKGVSAQELVGMASVLQSQSPISTQYPAPLIDTCGTGGDGASTFNISTAVAFVAAAAGVKVA  
KHGNRSASSKTGSADVLEALGINLNATPEKVQAAVGEV GITFLFAPGWHPALKAIASLRKTLK  
VRTVFNLLGPLVNPMRPTGQIIGVNDPLLEEIVQALS QLG CQQAIAVHGRERLDEAGLADVT  
DLAVLQDKKVRSLTLNPQELGLNFAPTAALCGGDVQENADILKAVLQGKGTQAQQDVVALN  
TALAFQVGEA IHGETDVLASCVKGI AFAKEILQSGAAWTKLEQLAEFLR

TrpD

>gi|14594711|gb|AAK68645.1| anthranilate phosphoribosyltransferase [Nostoc punctiforme PCC 73102]

MTTFPISAQEASASWYMLLQQLIDGQSLRSTQAAELMQGWLSEAVPPELSGAILTALNFRGISA  
DELTGMAEVLQSQSSPLSTQHGLNAPLSTALSTVIDTCGTGGDGSSTFNISTAVAFVAAAASGVP  
VAKHGNRSASSLTGSADVLEALGVNLSASSDKVQAALQEVGITFLFAPGWHPALKAVAQLRR  
TLRVRTVFNLLGPLVNPLRPSGQVVGLFTP KLLATVAQALN NLGKEKAIVLHGREKLDEAGLG  
DETDLAVLSDGEVQVTTINPLDL DLT PAPIGMLRGGDVQENAVILKAVLQGKGTQAQQDAVA  
LNASLALQVAGTIALLDHAQGIKIAKDILQSGAAWTKLEQLVEFLGN

TrpC-sc

>gi|186681733|ref|WP\_012408007.1| indole-3-glycerol-phosphate synthase [Nostoc punctiforme PCC 73102]

MTNQVTASRHILEEIVLHQRQEVAQMQQELPLASLQQQLITAPPVRNFLAALQQNPNQPSLIAE  
VKKASPSRGIIRADFDPAIAQAYERGGAA CLSVLTD RKFFHGSFDNLRNVRSHVALPLLCKEF  
IIDPYQIYLARTAGADAVLLIAAILSDQELQNFLQVIHDLGMNALVEVHTLAELDRVLKLDLH  
LVGINNRNLEDFTVDLGITQQLLAQRQQYLQSLDITV VSESGLYTPADLSLVAEAGVRAVLVG  
ESLVKQSDVEQAVRSLRLS

TrpC

>gi|186684302|ref|WP\_012410522.1| indole-3-glycerol-phosphate synthase [Nostoc punctiforme PCC 73102]

MQIRRRSPNPAIAVSMLRYQAAVPDSAPNNILEEIVWQKEVEYDLMREKVPLQELRKQVLTAP  
PTRDFVAALRQGKTKPALIAEVKKASPSKGVFREDFDPVAIAQSYQQGGASCLSVLTDVKFFQ  
GSFENLAKIRAAVDLPLLCKEFIIYAYQIYLARIHGADAILLIAAILGDQDLKYFLKIANNLKMA  
ALIEVHSLAELDRVLALDGVSLVGINNRNLEDFSVDLQTTTCQLLAARGSQLQEKNILVVSSEGL  
HNPDNLSLVLTAGASAVLIGESLVKQDPGAAIASILPKNF

TrpA-sc

>gi|186681732|ref|WP\_012408006.1| tryptophan synthase subunit alpha [Nostoc punctiforme PCC 73102]

MTSISNSFQTLRDRQQCALIPFITAGDPNLETTAQUALRILDRNGADFIELDGIPYSDPLADGPVIAQ  
AATRALQKGTKLEQVLEMLQAVPTLTKAPIILFTYYNPILHRGIKTFLAQIAAVGVQGLVVPDL  
PLEEAEELIQTAAASFGIEVILLVAPTSSKDRILAIARQSQGFYILVSVTGVTGIRAQIQDRVKDLIT  
DLRSVTDKPIGVGFGISGPEQAHQVREWGADAVIVGSAFVKRLAEGSPTERLQAVEKLCQELK  
AAITPVSLQQVVSAK

TrpA

>gi|186686628|ref|WP\_012412812.1| tryptophan synthase subunit alpha [Nostoc punctiforme PCC 73102]

MTAISDCFETLGHNHECALIPFITAGDPDLETTAKALQVLDQSGADIIELGIPYSDPLADGPVIQ  
AAATRALQRGTKLEHVLEMLQGITPKLRSPIVLFTYYNPILHRGIDKFLQEIAAAGVAGLVVPD  
LPLEEAAGLLEPAKEMGIDVILLVAPTSDAKRIEAIHSSQGFYILVSVTGVTGVRSQLSRVSD  
LLKQIRGVTEKPIGVGFGISDAAQARQVKEWGADAAIVGSAVVKRLAEGTPEQGLSAIAQLCQ  
SLKAAIKTSTNTPLD

TrpB-sc

>gi|186681730|ref|WP\_012408004.1| tryptophan synthase subunit beta [Nostoc punctiforme PCC 73102]

MVSIQDIKTATIQPDSLGRFGRFGGKYVPETLMPALSELEAAFQKYRNEPSFQAEIQNLLRDYV  
GRPSPLYFAERLTANYARPDGTGPQIYLKREDLNHTGAHKINNALAQVLLAKRMGKQRVIAE  
TGAGQHG VATATVCARFGLRCVIYMGIHDMERQALNVFRMMLMGAEVHPVEAGTGTLKDA  
TSEAIRDWVTNVETTHYILGSVAGPHPYPMIVRDFHAIIGIETRAQSQEKWEGLPDILLACVGG  
GSNAIGLFYEFLNEPSIRLIGVEAAGEGVNTEKHAATLTKGKIGVLHGAMS YLLQDDDGGQIIEA  
HSISAGLDYPGVGPEHSYKDLGRAEYYSVTDKQALEAFQRLSQLEGIIPALET AHAIAYLETL  
CPELEGS PRIVINCSGRGDKDVQTVAKVLIP

TrpB

>gi|186684297|ref|WP\_012410517.1| tryptophan synthase subunit beta [Nostoc punctiforme PCC 73102]

MTTTPSPSSTAQVPDALGRFGRFGGKYVPETLMPALAELETAYQQYRNEPGFQAELQQLLRD  
YVGRATPLYFAERLTAHYARPDRTGPQVYLKREDLNHTGAHKINNALGQVLLAKRMGKQRII  
AETGAGQHGVATATVCARFGLECVIYMGVHDMERQSLNVFRMRLMGAEVRPVEAGTGTLK  
DATSEAIRDWVTNVETTHYILGSVAGPHPYPMVMRDFHAVIGQETRQAMEKWTLPDILLA  
CVGGGSNAMGLFYEFINEPSIRFIGIEAAGEGVNTEKHAATLTKGRVGVLHGAMS YLLQDEDG  
QIEAHSISAGLDYPGVGPPEHSYKDTGRAEYYSVTDAEAMAAAFQRLSKLEGIIPALETAHAIA  
YLETLCPQLSGSPRIVINCSGRGDKDVQTVAKLLDPA

TrpEG-sc

>gi|186681734|ref|WP\_012408008.1| anthranilate synthase [Nostoc punctiforme PCC 73102]

MIFNSRSYKTLGGVIVSRSITEVKMDTALEDILFHLNSQRGGLLRSSYEYPGRYKRWAI GFVNP  
PLELTTQENAFNLIALNERGLVLLPLLECLSNLQLEKVTLDNNNIVGFVKSTKRLFTEEERSK  
QPSAFTVVREILHTFSSQEDEHLGLYGAFGYDLVFQFEPITQSLERPDKDQRDLVLYLPDELIVD  
YYQQRAFRLQYDFETAHGNTKNLPRTGESVDYRKGHLTPNETADHKVGEYAKKVESALDYF  
RRGDLFEVVPSONFFEGYEDEPSKLFETLKDINPSYGFIFNLGGEYLIGASPEMFVRVEGKRVE  
TCPISGTISRGLDALDDAVQIRHLLNSHKDEAELTMCTDVDRNDKSRICEPGSVQVIGRRQIEL  
YSHLIHTVDHVEGTLSRQFDALDAFLSHTWAVTVTGAPKKAIDFIEQHERSARRWYGGAVG  
YLNFNGLNLTGLILRTIRLKDCIAEVRVGATVLYDSIPQAEQETITKAAALFETIRRVKQSSHK  
IDESSIKSTKILPCVATGKRILLIDYEDSFVHTLANYIRQTGASVTTLRHGFSETLFDTERPDLV  
VLSPPGPRPSDFRVPQTVGALLHRKIPIFGVCLGLQSIVEAFDQGLVNLNYPQHGKSSRIFVTDS  
DSVTFKNLPESFTVGRYHSLFALPQHLPQELKVTASDDNVIMGIEHQTLPIAAVQFHPESIMTL  
AGEVGLEIKNVVRA YTQVEESLVIGH

TrpE

>gi|186685226|ref|WP\_012411432.1| anthranilate synthase component I [Nostoc punctiforme PCC 73102]

MIFPHFSQFSSLAQQGNFVPVYQEWVADLTPVSAWYKVCAGQPYSFLLESIEGGEKLG RYSL  
VGCDPLWVLEARGDRTTQLNRDGSQVVFAGDPFAALAECLAPYHPVKLPELPPGIGGLFGFW  
GYELINWIEPRVPIYPPDERNIPDGLWMQVDHLLIFDQVKRKIWAIA YADLRDPNVDLHAAYQ  
QACDRVTQMLEKLSLPLSPEKTRLEWKSPGSRGAEEQKSGETDEYNSNFTRPDFC ASVQKAK  
DYIKAGDIFQVVISQRLSTPYTGDPFALYRSLRQINPSPYMAYFNFQDWQIIGSSPEVMVKAET  
APDGGVIATVRPIAGTRPRGKTTQQDAAFQAQDLEDPKEVAEHVMLVDLGRNDLGRVCQNGS  
VKVDELMVVERYSHVMHIVSNVVGKLA LDKTAWDLLKACFPAGTVSGAPKIRAMEI IHELES  
SRRGVYSGVYGYDFEGQLNTAIAIRTMVVHDKTVSVQAGAGLVADSEPEKEYEETLNKARG  
LLEAIRCLR

TrpG

>gi|186681805|ref|WP\_012408079.1| glutamine amidotransferase [Nostoc punctiforme PCC 73102]

MIIVIDNYDSFTYNLVQYLGELAAEFVADDIKVFRNDKISIDEIRALKPEAVVISPGPGRPEDA  
GISLELIEQLGQELPILGVCLGHQSIGQVFGGKIIPAPELMHGKTSQVSHTGVGVFRGLENPLIAT  
RYHSLVIERETCPDVLEITAWVEDNTIMGVRHRNYPHIQGVQFHPESVLTSSGKQLLRNFLEQL  
QSR
