# Supplementary material for: Timing the Evolutionary Advent of Cyanobacteria and the Later Great Oxidation Event Using Gene Phylogenies of a Sunscreen
Source: PubMed Central journal article supplement (PMC6529634; doi:10.1128/mbio.00561-19), 2019-05-21

SUPPLEMENTARY FIGURE 1

Phylogenetic relationships of cyanobacteria derived from neighbor-joining analysis of amino acid sequences of the core scytonemin genes *scyABC*. Numbers next to nodes represent non-parametric bootstrap support values based on 1000 replicates. Scytonemin-operon homologue sequences are demarcated by the orange bar, most closely related genes from other bacteria by the blue bar.

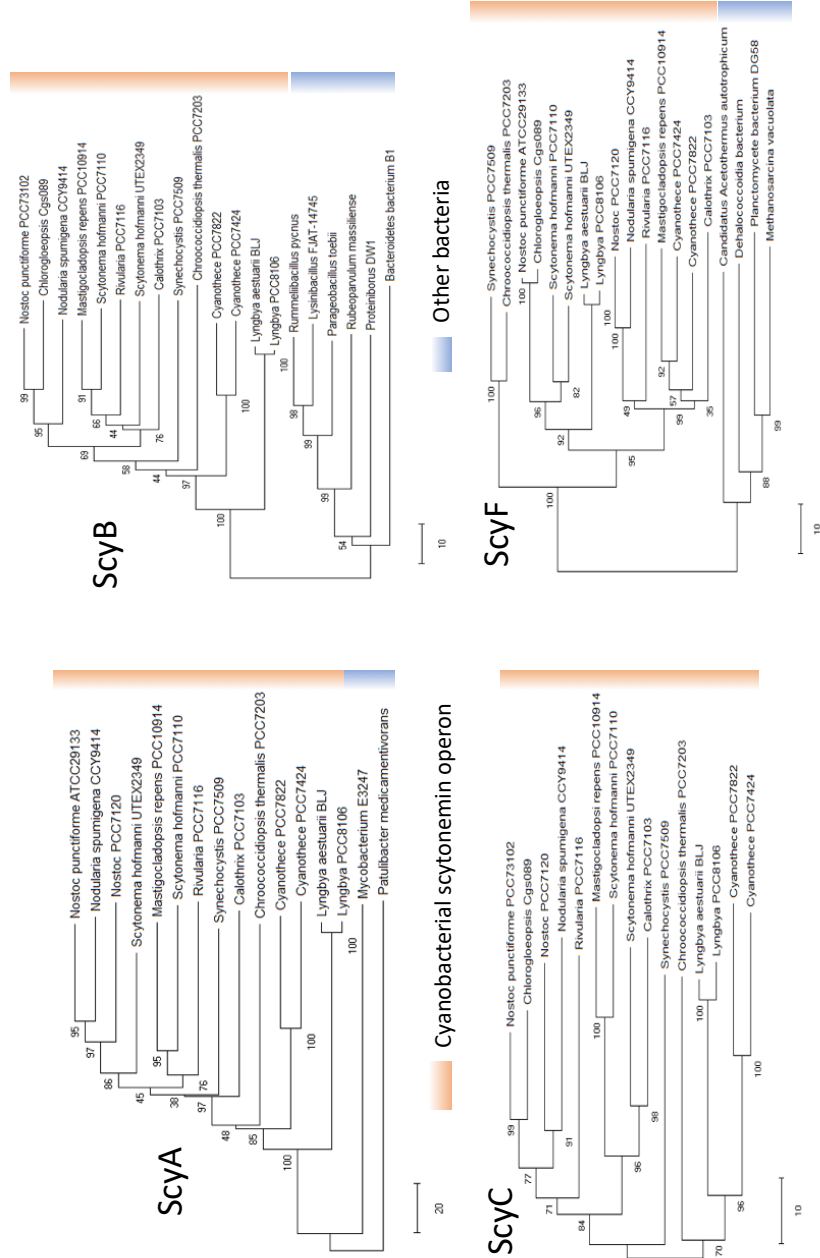

Supplement: mBio.00561-19-sf001.pdf [file mBio.00561-19-sf001.pdf]
