# Supplementary material for: Timing the Evolutionary Advent of Cyanobacteria and the Later Great Oxidation Event Using Gene Phylogenies of a Sunscreen
Source: PubMed Central journal article supplement (PMC6529634; doi:10.1128/mbio.00561-19), 2019-05-21

SUPPLEMENTARY FIGURE 9

Phylogeny derived from BEAST analyses of TrpE amino acid sequences for scytonemin-dedicated AAAB genes. Entries in blue type correspond to homologs found within full scytonemin operons. Those marked by a blue arrow, were found in remnant scytonemin operons or correspond to supernumerary homologues. Bayesian posterior probabilities (BPP) at the nodes are color coded as follows: red for  $BPP \geq 0.8$ , pink for  $0.8 \geq BPP \geq 0.5$  and white for  $BPP \leq 0.5$ .

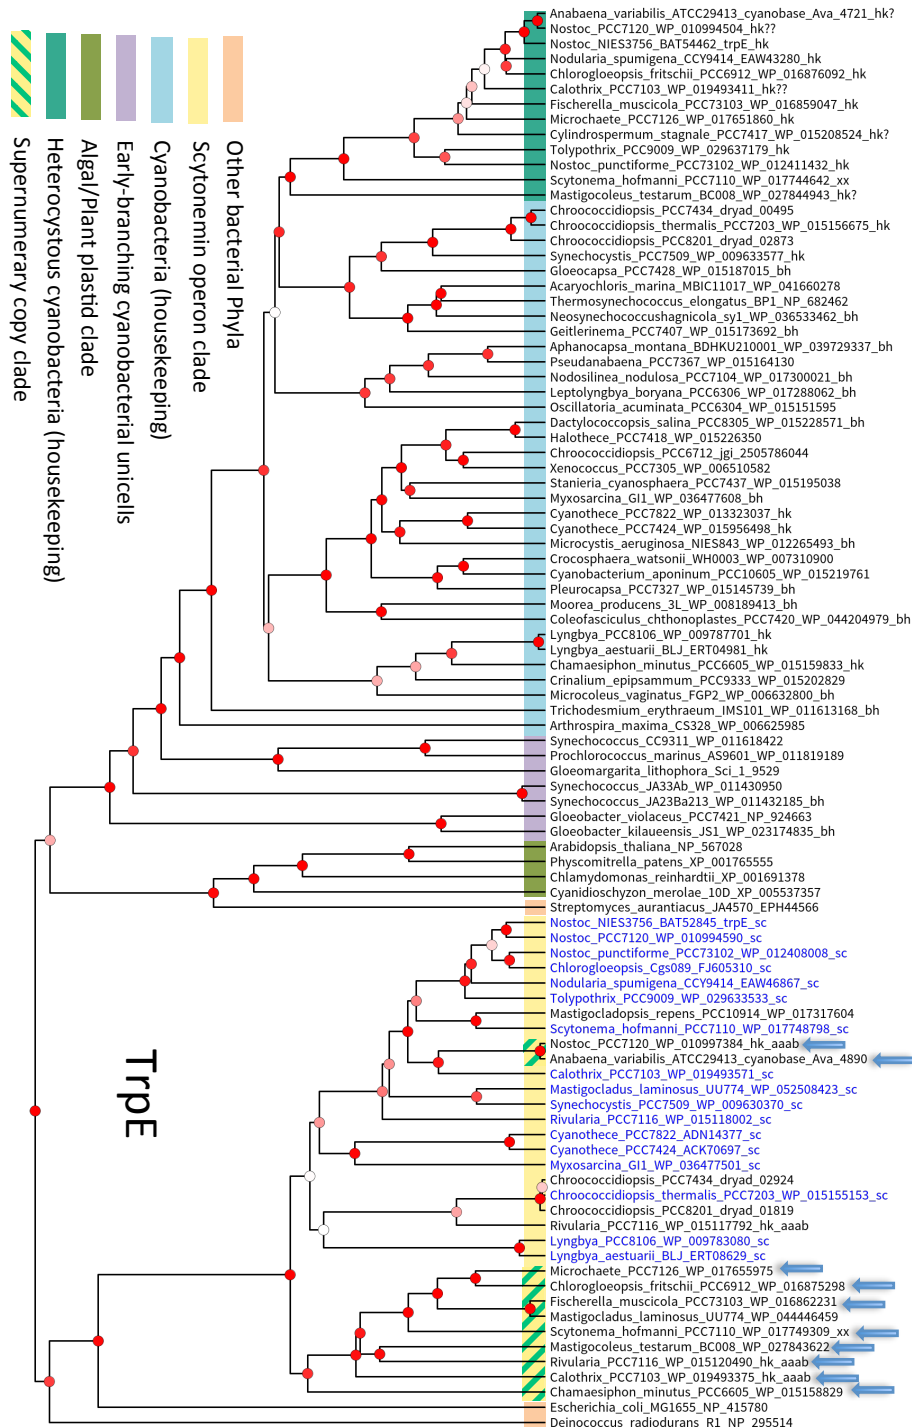

Supplement: mBio.00561-19-sf009.pdf [file mBio.00561-19-sf009.pdf]
